# Supplementary material
Source: PubMed Central journal article supplement (PMC3174536)
Supplement: supp_00066.2011_tableS1.pdf [file supp_00066.2011_tableS1.pdf]

# Supplemental Table 1. Primers used for qRT-PCR

## miRNA Quantitation :

|                       |                                                                                                        |
|-----------------------|--------------------------------------------------------------------------------------------------------|
| <b>RTQ</b>            | CGAATTCCTAGAGCTCGAGGCAGGCACATGGCTGGCTAGTTAAGCTTGGTACCGAGCTCGGATCCACTAGTCCTTTTTTTTTTTTTTTTTTTTTTTTTTTVN |
| <b>RTQ-UNIr</b>       | CGAATTCCTAGAGCTCGAGGCAGG                                                                               |
| <b>hsa-miR-30a</b>    | TGTAAACATCCTCGACTGGAAG                                                                                 |
| <b>hsa-miR-362-5p</b> | AATCCTTGGAACCTAGGTGTGAGT                                                                               |
| <b>hsa-miR-10a</b>    | TACCCTGTAGATCCGAATTTGTG                                                                                |
| <b>hsa-miR-365</b>    | TAATGCCCTAAAAATCCTTAT                                                                                  |
| <b>hsa-miR-205</b>    | CCTTCATTCACCGGAGTCT                                                                                    |
| <b>hsa-miR-221</b>    | AGCTACATTGTCTGCTGGGTTC                                                                                 |
| <b>hsa-miR-324-5p</b> | CGCATCCCCTAGGGCATTGGTGT                                                                                |
| <b>hsa-miR-588</b>    | TTGGCCACAATGGGTTAGAAC                                                                                  |
| <b>hsa-miR-331-3p</b> | CCCCTGGGCCTATCCTAGAA                                                                                   |
| <b>hsa-miR-34a</b>    | TGGCAGTGTCTTAGCTGGTTGT                                                                                 |
| <b>hsa-miR-130a</b>   | CAGTGCAATGTTAAAAGGGCAT                                                                                 |
| <b>hsa-miR-143</b>    | TGAGATGAAGCACTGTAGCTC                                                                                  |
| <b>hsa-miR-145</b>    | GTCCAGTTTTCCCAGGAATCCCT                                                                                |
| <b>hsa-let-7a1</b>    | TGAGGTAGTAGGTTGTATAGTT                                                                                 |
| <b>h5S rRNA</b>       | TACCGGGTGCTGTAGGCTTT                                                                                   |

## pre mRNA :

|                                  | 5'                   | 3'                   |
|----------------------------------|----------------------|----------------------|
| <b>Mybl2 intron 2/exon 3</b>     | CTGCACGTATGTGTGCTGAG | TTCCAGTCCTGCTGTCCAAA |
| <b>cyclin D2 exon 4/intron 4</b> | TGAGCTCGCTCACTTGTGAT | AAATCCGTCGTCTCCTTCCC |
| <b>c-myc intron 1/exon 2</b>     | TTTAACTCAAGACTGCCTCC | GTCGAGGTCATAGTTCCTGT |
